# Supplementary material for: Preparation and photo-physical characterisation of nanocomposites obtained by intercalation and co-intercalation of organic chromophores into hydrotalcite-like compounds
Source: Royal Society of Chemistry journal article supplement (doi:10.1039/b204393a), 2002-01-01
Supplement: b204393a.doc [file b204393a.doc]

**Legends of figures placed in ESI**

**Figure 1S.** Thermogravimetric curves of MgAl-3-CCA, MgAl-9-ACA and MgAl-4-BBA samples.

**Figure 2S.** TG curves of MgAl-2-NSA2 and MgAl-2-NSA1 samples.

**Figure 3S.** Computer generated model showing the most probable arrangement of 2-NSA anions between the HTlc layers.

**Figure 4S.** Absorption spectra of MgAl-2-NSA, MgAl-4-BBA and of sample **5**.

**Figure 5S.** Emission spectra of: (a) MgAl-2-NSA, MgAl-4-BBA using exc = 333 nm; (b) co-intercaleted sample **5** using exc = 313 nm and exc = 366 nm.

**Figure 6S.** Time resolved absorption spectra of 9-ACA and 3-CCA in Mg-Al-HTlc by regeneration (sample **4**) recorded 2.8 s, 24 s and 80 s after the laser pulse (exc= 355 nm).
